# Supplementary material for: In situ preparation of MgCo2O4 nanosheets on Ni-foam as a binder-free electrode for high performance hybrid supercapacitors
Source: Royal Society of Chemistry journal article supplement (doi:10.1039/c8dt00591e), 2018-01-01
Supplement: c8dt00591e1.pdf [file c8dt00591e1.pdf]

# Supporting Information

## In-situ preparation of $\text{MgCo}_2\text{O}_4$ nanosheets on Ni-foam as a binder-free electrode for high performance hybrid supercapacitors

Subbukalai Vijayakumar, Sadayappan Nagamuthu, Kwang-Sun Ryu\*

*Department of Chemistry and Energy Harvest Storage Research Center (EHSRC), University of Ulsan, Muger-dong, Nam-gu, Ulsan 680-749, Republic of Korea*

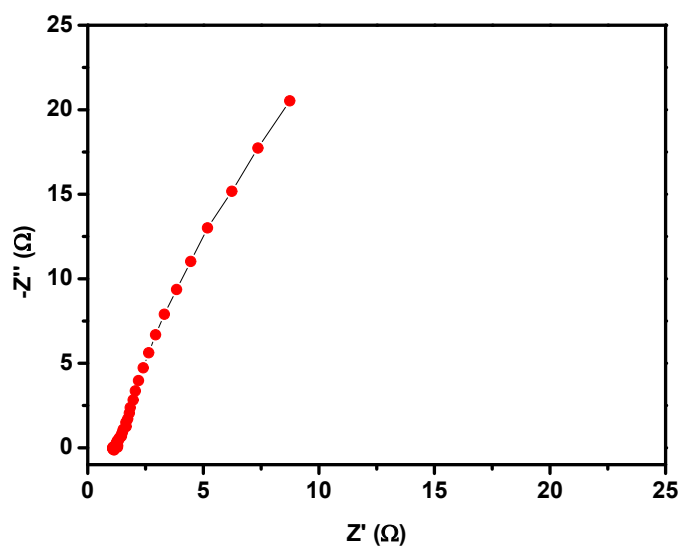

Fig. S1. Impedance of  $\text{MgCo}_2\text{O}_4$  electrode

Table S1. Summary of recent reports of MgCo<sub>2</sub>O<sub>4</sub>

| <b>Materials</b>                                  | <b>Morphology</b>                    | <b>Electrolyte</b> | <b>Specific capacity (C g<sup>-1</sup>)</b> | <b>Current (A g<sup>-1</sup>)</b> | <b>Reference</b> |
|---------------------------------------------------|--------------------------------------|--------------------|---------------------------------------------|-----------------------------------|------------------|
| <b>MgCo<sub>2</sub>O<sub>4</sub> on Ni-foam</b>   | Nanocone arrays                      | 6.0 M KOH          | 300                                         | 1                                 | 19               |
| <b>MgCo<sub>2</sub>O<sub>4</sub> powders</b>      | Porous double-urchin like morphology | 2.0 M KOH          | 254                                         | 2                                 | 29               |
| <b>MgCo<sub>2</sub>O<sub>4</sub> /rGO powders</b> | Flaky flowery structure              | 3.0 M LiOH         | 284.4                                       | 2.5 mA cm <sup>-2</sup>           | 30               |
| <b>MgCo<sub>2</sub>O<sub>4</sub> powders</b>      | Cuboidal microcrystal                | 3.0 M LiOH         | 345                                         | 1                                 | 31               |
| <b>MgCo<sub>2</sub>O<sub>4</sub> on Ni-foam</b>   | nanosheets                           | 2.0 M KOH          | 947                                         | 2                                 | Present work     |
